# Supplementary material for: Extreme Heat, Birth Outcomes, and Socioeconomic Heterogeneity
Source: Oxford University Press journal article supplement (doi:10.1215/00703370-10174836), 2022-09-06
Supplement: conte_esm.pdf [file conte_esm.pdf]

# Online Appendix: Extreme heat, birth outcomes, and socioeconomic heterogeneity

Risto Conte Keivabu, Marco Cozzani

E-mail: [risto.conte@eui.eu](mailto:risto.conte@eui.eu); [marco.cozzani@eui.eu](mailto:marco.cozzani@eui.eu)

This file includes Tables S1–S8 and Figure S1.

Table S1. Baseline model without imputed values for gestational age

|            | (1)               | (2)               | (3)                | (4)                | (5)                | (6)                | (7)               | (8)                | (9)               |
|------------|-------------------|-------------------|--------------------|--------------------|--------------------|--------------------|-------------------|--------------------|-------------------|
|            | PTB               | PTB               | PTB                | LBW                | LBW                | LBW                | VLBW              | VLBW               | VLBW              |
|            | <u>High SES</u>   | <u>Medium SES</u> | <u>Low SES</u>     | <u>High SES</u>    | <u>Medium SES</u>  | <u>Low SES</u>     | <u>High SES</u>   | <u>Medium SES</u>  | <u>Low SES</u>    |
| Days < 5°C | 0.007<br>(0.004)  | -0.003<br>(0.003) | 0.008<br>(0.004)   | -0.002<br>(0.003)  | -0.007*<br>(0.003) | -0.007*<br>(0.003) | -0.001<br>(0.001) | -0.001<br>(0.001)  | -0.001<br>(0.001) |
| 25° - 32°C | -0.001<br>(0.004) | -0.004<br>(0.002) | -0.008*<br>(0.003) | 0.001<br>(0.002)   | -0.001<br>(0.002)  | -0.002<br>(0.003)  | -0.000<br>(0.001) | -0.001*<br>(0.001) | 0.001<br>(0.001)  |
| > 32°C     | 0.020<br>(0.023)  | 0.008<br>(0.016)  | -0.004<br>(0.025)  | -0.038*<br>(0.016) | 0.039<br>(0.024)   | 0.057*<br>(0.014)  | -0.006<br>(0.006) | -0.002<br>(0.005)  | 0.028*<br>(0.008) |
| N          | 1,317,759         | 996,658           | 1,085,811          | 1,298,945          | 980,226            | 1,060,057          | 1,298,945         | 980,226            | 1,060,057         |

*Note:* Estimated impacts of temperature on birth outcomes by trimester of gestation and by parental socio-economic status. Robust standard errors in parentheses clustered at the provincial capital level. Coefficients are scaled by 100 to enhance readability, and they can be interpreted as percentage points changes in the specific birth outcome. The 5°-25° degrees bin is omitted as it is the reference bin referring to the comfort zone. Each model includes province-by-year of conception, province-specific polynomial quadratic in the century month of conception, and month of conception fixed effects. Demographic control variables include sex of the newborn, maternal marital status, maternal age, age squared, whether the child was firstborn, and maternal ethnic origin. Contextual controls include: population density, female employment rate, logarithm of the provincial GDP, the provincial-cohort-specific share of women with a tertiary degree, vegetation. Climatic controls include: relative humidity, solar radiation, wind speed, and average precipitation.

Significance levels: \* p<0.05

Table S2. Linear probability models estimating the effect of temperatures by SES and trimester of pregnancy

|                         | (1)               | (2)                | (3)                | (4)                | (5)                | (6)                | (7)               | (8)                | (9)               |
|-------------------------|-------------------|--------------------|--------------------|--------------------|--------------------|--------------------|-------------------|--------------------|-------------------|
|                         | PTB               | PTB                | PTB                | LBW                | LBW                | LBW                | VLBW              | VLBW               | VLBW              |
|                         | High SES          | Med SES            | Low SES            | High SES           | Med SES            | Low SES            | High SES          | Med SES            | Low SES           |
| <b>First Trimester</b>  |                   |                    |                    |                    |                    |                    |                   |                    |                   |
| Days < 5°C              | -0.002<br>(0.003) | -0.010*<br>(0.005) | 0.007<br>(0.006)   | -0.002<br>(0.004)  | -0.007<br>(0.004)  | -0.001<br>(0.004)  | 0.001<br>(0.001)  | -0.001<br>(0.001)  | 0.001<br>(0.002)  |
| 25° - 32°C              | 0.003<br>(0.004)  | -0.007<br>(0.004)  | -0.010*<br>(0.004) | 0.001<br>(0.004)   | -0.004<br>(0.003)  | -0.005<br>(0.003)  | 0.001<br>(0.001)  | -0.002*<br>(0.001) | -0.001<br>(0.001) |
| > 32°C                  | -0.005<br>(0.020) | 0.003<br>(0.076)   | -0.006<br>(0.026)  | -0.036<br>(0.023)  | 0.048*<br>(0.018)  | 0.033*<br>(0.016)  | 0.009<br>(0.011)  | -0.001<br>(0.008)  | 0.023<br>(0.013)  |
| <b>Second Trimester</b> |                   |                    |                    |                    |                    |                    |                   |                    |                   |
| Days < 5°C              | 0.006<br>(0.004)  | -0.012*<br>(0.004) | 0.005<br>(0.005)   | -0.001<br>(0.003)  | -0.012*<br>(0.004) | -0.011*<br>(0.003) | -0.001<br>(0.001) | -0.002<br>(0.001)  | -0.002<br>(0.001) |
| 25° - 32°C              | 0.003<br>(0.003)  | 0.005<br>(0.004)   | -0.006<br>(0.003)  | -0.001<br>(0.002)  | 0.002<br>(0.003)   | -0.001<br>(0.003)  | 0.001<br>(0.001)  | -0.001<br>(0.001)  | 0.000<br>(0.001)  |
| > 32°C                  | -0.049<br>(0.027) | -0.076<br>(0.042)  | 0.053<br>(0.041)   | -0.002<br>(0.027)  | 0.028<br>(0.032)   | 0.085*<br>(0.026)  | -0.009<br>(0.005) | 0.001<br>(0.006)   | 0.023*<br>(0.007) |
| <b>Third Trimester</b>  |                   |                    |                    |                    |                    |                    |                   |                    |                   |
| Days < 5°C              | 0.001<br>(0.004)  | -0.013*<br>(0.005) | -0.005<br>(0.004)  | -0.004<br>(0.006)  | -0.005<br>(0.005)  | -0.005<br>(0.004)  | 0.001<br>(0.001)  | -0.001<br>(0.001)  | -0.002<br>(0.001) |
| 25° - 32°C              | 0.001<br>(0.004)  | 0.001<br>(0.004)   | -0.003<br>(0.004)  | 0.002<br>(0.002)   | 0.003<br>(0.004)   | 0.004<br>(0.003)   | -0.001<br>(0.001) | -0.001<br>(0.001)  | 0.001<br>(0.001)  |
| > 32°C                  | -0.017<br>(0.022) | -0.027<br>(0.033)  | -0.083*<br>(0.034) | -0.042*<br>(0.011) | 0.034<br>(0.044)   | -0.006<br>(0.016)  | -0.007<br>(0.006) | -0.006<br>(0.007)  | 0.017*<br>(0.007) |
| N.                      | 1,482,984         | 1,146,060          | 1,301,743          | 1,446,251          | 1,113,128          | 1,248,156          | 1,446,251         | 1,113,128          | 1,248,156         |

*Note:* Estimated impacts of temperature on birth outcomes by trimester of gestation and by parental socio-economic status. Robust standard errors in parentheses clustered at the provincial capital level. Coefficients are scaled by 100 to enhance readability, and they can be interpreted as percentage points changes in the specific birth outcome. The 5°-25° degrees bin is omitted as it is the reference bin referring to the comfort zone. Each model includes province-by-year of conception, province-specific polynomial quadratic in the century month of conception, and month of conception fixed effects. Demographic control variables include sex of the newborn, maternal marital status, maternal age, age squared whether the child was firstborn, and maternal ethnic origin. Contextual controls include: population density, female employment rate, logarithm of the provincial GDP, the provincial-cohort-specific share of women with a tertiary degree, vegetation. Climatic controls include: relative humidity, solar radiation, wind speed, and average precipitation.

Significance levels: \* p<0.05

Table S3. Effect of heat index on birth outcomes by SES

| VARIABLES               | (1)                | (2)                | (3)                | (4)                | (5)                | (6)                | (7)               | (8)                | (9)               |
|-------------------------|--------------------|--------------------|--------------------|--------------------|--------------------|--------------------|-------------------|--------------------|-------------------|
|                         | PTB<br>High SES    | PTB<br>Medium SES  | PTB<br>Low SES     | LBW<br>High SES    | LBW<br>Medium SES  | LBW<br>Low SES     | VLBW<br>High SES  | VLBW<br>Medium SES | VLBW<br>Low SES   |
| <b>First Trimester</b>  |                    |                    |                    |                    |                    |                    |                   |                    |                   |
| Cold                    | -0.002<br>(0.003)  | -0.011*<br>(0.004) | 0.007<br>(0.004)   | -0.000<br>(0.003)  | -0.004<br>(0.004)  | 0.001<br>(0.004)   | -0.000<br>(0.001) | -0.002<br>(0.001)  | 0.001<br>(0.001)  |
| Caution                 | 0.003<br>(0.007)   | -0.003<br>(0.007)  | -0.013*<br>(0.005) | 0.004<br>(0.004)   | -0.004<br>(0.004)  | -0.003<br>(0.004)  | 0.001<br>(0.001)  | -0.002<br>(0.001)  | 0.000<br>(0.002)  |
| Extreme Caution         | -0.008<br>(0.026)  | -0.025<br>(0.049)  | 0.025<br>(0.017)   | -0.018<br>(0.027)  | 0.018<br>(0.019)   | -0.001<br>(0.025)  | -0.002<br>(0.007) | -0.008<br>(0.006)  | 0.002<br>(0.009)  |
| <b>Second Trimester</b> |                    |                    |                    |                    |                    |                    |                   |                    |                   |
| Cold                    | 0.003<br>(0.002)   | -0.012*<br>(0.004) | 0.005<br>(0.004)   | 0.002<br>(0.003)   | -0.011*<br>(0.003) | -0.007*<br>(0.003) | 0.000<br>(0.001)  | -0.002<br>(0.001)  | -0.000<br>(0.001) |
| Caution                 | 0.005<br>(0.005)   | 0.005<br>(0.006)   | -0.015*<br>(0.004) | -0.002<br>(0.004)  | 0.004<br>(0.004)   | -0.005<br>(0.004)  | -0.000<br>(0.001) | 0.000<br>(0.001)   | -0.001<br>(0.002) |
| Extreme Caution         | -0.054*<br>(0.022) | -0.033<br>(0.031)  | 0.081*<br>(0.027)  | 0.004<br>(0.009)   | 0.007<br>(0.022)   | 0.057*<br>(0.018)  | -0.005<br>(0.006) | -0.001<br>(0.009)  | 0.016*<br>(0.005) |
| <b>Third Trimester</b>  |                    |                    |                    |                    |                    |                    |                   |                    |                   |
| Cold                    | -0.001<br>(0.005)  | -0.013*<br>(0.006) | -0.001<br>(0.003)  | 0.000<br>(0.004)   | -0.004<br>(0.004)  | -0.002<br>(0.003)  | 0.000<br>(0.001)  | -0.001<br>(0.001)  | -0.001<br>(0.001) |
| Caution                 | 0.001<br>(0.005)   | 0.002<br>(0.004)   | -0.006<br>(0.004)  | 0.004<br>(0.002)   | 0.005<br>(0.004)   | 0.008<br>(0.004)   | -0.001<br>(0.001) | -0.000<br>(0.001)  | 0.001<br>(0.001)  |
| Extreme Caution         | -0.033<br>(0.021)  | -0.020<br>(0.025)  | -0.008<br>(0.024)  | -0.035*<br>(0.014) | 0.021<br>(0.029)   | -0.013<br>(0.010)  | -0.001<br>(0.004) | -0.002<br>(0.008)  | 0.011*<br>(0.005) |
| Observations            | 1,482,984          | 1,146,060          | 1,301,743          | 1,446,251          | 1,113,128          | 1,248,156          | 1,446,251         | 1,113,128          | 1,248,156         |

Note: Estimated impacts of heat index on birth outcomes by trimester of gestation and by parental socio-economic status. Robust standard errors in parentheses clustered at the provincial capital level. Coefficients are scaled by 100 to enhance readability, and they can be interpreted as percentage points changes in the specific birth outcome. Each model includes province-by-year of conception, province-specific polynomial quadratic in the century month of conception, and month of conception fixed effects. Demographic control variables include sex of the newborn, maternal marital status, maternal age, age squared whether the child was firstborn, and maternal ethnicorigin. Contextual controls include: population density, female employment rate, logarithm of the provincial GDP, the provincial- cohort-specific share of women with a tertiary degree, vegetation. Climatic controls include: relative humidity, solar radiation, wind speed, and average precipitation.

Significance levels: \* p<0.05.

Table S4. Linear probability models predicting the effect of temperatures on birth outcomes by SES; alternative temperature bins specification

| VARIABLES               | (1)<br>PTB<br>High SES | (2)<br>PTB<br>Medium<br>SES | (3)<br>PTB<br>Low SES | (4)<br>LBW<br>High SES | (5)<br>LBW<br>Medium<br>SES | (6)<br>LBW<br>Low SES | (7)<br>VLBW<br>High SES | (8)<br>VLBW<br>Medium<br>SES | (9)<br>VLBW<br>Low SES |
|-------------------------|------------------------|-----------------------------|-----------------------|------------------------|-----------------------------|-----------------------|-------------------------|------------------------------|------------------------|
| <b>First Trimester</b>  |                        |                             |                       |                        |                             |                       |                         |                              |                        |
| Days < 0°               | -0.001<br>(0.019)      | 0.019<br>(0.034)            | 0.029<br>(0.021)      | 0.021<br>(0.024)       | 0.005<br>(0.028)            | -0.010<br>(0.018)     | 0.006<br>(0.006)        | 0.001<br>(0.009)             | 0.005<br>(0.007)       |
| 0°-5°                   | -0.001<br>(0.004)      | -0.007<br>(0.006)           | 0.009<br>(0.008)      | -0.003<br>(0.005)      | -0.005<br>(0.004)           | 0.006<br>(0.005)      | -0.001<br>(0.001)       | -0.002<br>(0.002)            | 0.002<br>(0.002)       |
| 5°-10°                  | -0.000<br>(0.002)      | 0.010*<br>(0.004)           | 0.004<br>(0.003)      | 0.004<br>(0.003)       | 0.008*<br>(0.004)           | 0.002<br>(0.003)      | 0.001<br>(0.001)        | 0.002<br>(0.002)             | 0.001<br>(0.001)       |
| 25°-30°                 | 0.005<br>(0.004)       | -0.010*<br>(0.004)          | -0.012*<br>(0.004)    | -0.000<br>(0.005)      | -0.008*<br>(0.003)          | -0.006<br>(0.003)     | -0.000<br>(0.001)       | -0.003*<br>(0.001)           | -0.001<br>(0.001)      |
| >30°                    | -0.011<br>(0.007)      | -0.004<br>(0.017)           | -0.007<br>(0.012)     | -0.001<br>(0.014)      | 0.010<br>(0.008)            | 0.001<br>(0.005)      | 0.004<br>(0.004)        | 0.002<br>(0.002)             | 0.007<br>(0.005)       |
| <b>Second Trimester</b> |                        |                             |                       |                        |                             |                       |                         |                              |                        |
| Days < 0°               | -0.089*<br>(0.031)     | -0.007<br>(0.036)           | -0.014<br>(0.039)     | -0.045*<br>(0.018)     | 0.002<br>(0.021)            | -0.039<br>(0.025)     | 0.002<br>(0.006)        | 0.012<br>(0.007)             | -0.005<br>(0.005)      |
| 0°-5°                   | 0.020*<br>(0.006)      | -0.010<br>(0.007)           | 0.009<br>(0.007)      | 0.006<br>(0.004)       | -0.012*<br>(0.004)          | -0.003<br>(0.005)     | -0.001<br>(0.001)       | -0.004*<br>(0.001)           | -0.001<br>(0.002)      |
| 5°-10°                  | -0.006<br>(0.005)      | -0.007<br>(0.005)           | -0.005<br>(0.003)     | -0.001<br>(0.002)      | -0.004<br>(0.003)           | -0.007*<br>(0.003)    | 0.001<br>(0.001)        | 0.001<br>(0.001)             | -0.001<br>(0.001)      |
| 25°-30°                 | 0.001<br>(0.003)       | 0.005<br>(0.004)            | -0.008*<br>(0.004)    | 0.000<br>(0.003)       | 0.001<br>(0.004)            | -0.003<br>(0.003)     | 0.000<br>(0.001)        | -0.001<br>(0.001)            | 0.000<br>(0.001)       |
| >30°                    | 0.009<br>(0.021)       | -0.000<br>(0.018)           | 0.020<br>(0.014)      | -0.006<br>(0.012)      | 0.014<br>(0.009)            | 0.028*<br>(0.008)     | -0.004<br>(0.003)       | 0.002<br>(0.003)             | 0.004<br>(0.004)       |
| <b>Third Trimester</b>  |                        |                             |                       |                        |                             |                       |                         |                              |                        |
| Days < 0°               | -0.024<br>(0.019)      | 0.032<br>(0.027)            | 0.009<br>(0.021)      | -0.003<br>(0.025)      | 0.000<br>(0.025)            | -0.030<br>(0.025)     | 0.012*<br>(0.005)       | 0.004<br>(0.009)             | 0.009<br>(0.009)       |
| 0°-5°                   | 0.004<br>(0.005)       | -0.012<br>(0.007)           | -0.003<br>(0.006)     | -0.001<br>(0.008)      | -0.001<br>(0.005)           | 0.002<br>(0.005)      | -0.001<br>(0.001)       | 0.000<br>(0.002)             | -0.003<br>(0.002)      |
| 5°-10°                  | -0.006<br>(0.004)      | 0.004<br>(0.005)            | 0.006<br>(0.004)      | 0.001<br>(0.003)       | -0.000<br>(0.004)           | -0.001<br>(0.004)     | 0.000<br>(0.001)        | 0.001<br>(0.001)             | 0.001<br>(0.001)       |
| 25°-30°                 | 0.001<br>(0.003)       | 0.001<br>(0.003)            | -0.001<br>(0.005)     | 0.002<br>(0.002)       | 0.002<br>(0.005)            | 0.004<br>(0.004)      | -0.000<br>(0.001)       | -0.002<br>(0.001)            | 0.000<br>(0.001)       |
| >30°                    | -0.000<br>(0.019)      | -0.017<br>(0.011)           | -0.037*<br>(0.015)    | -0.007<br>(0.010)      | 0.006<br>(0.013)            | 0.001<br>(0.007)      | -0.003<br>(0.003)       | 0.002<br>(0.004)             | 0.007<br>(0.004)       |

N 1,692,065 1,400,944 1,756,994 1,645,819 1,351,060 1,663,483 1,645,819 1,351,060 1,663,483

Note: Estimated impacts of temperature on birth outcomes by trimester of gestation and by parental socio-economic status. Robust standard errors in parentheses clustered at the provincial capital level. Coefficients are scaled by 100 to enhance readability, and they can be interpreted as percentage points changes in the specific birth outcome. The 5°-20° degrees bin is omitted as it is the reference bin referring to the comfort zone. Each model includes province-by-year of conception, province-specific polynomial quadratic in the century month of conception, and month of conception fixed effects. Demographic control variables include sex of the newborn, maternal marital status, maternal age, age squared, whether the child was firstborn, and maternal ethnic origin. Contextual controls include: population density, female employment rate, logarithm of the provincial GDP, the provincial-cohort-specific share of women with a tertiary degree, vegetation. Climatic controls include: relative humidity, solar radiation, wind speed, and average precipitation.

Significance levels: \* p<0.05

Table S5. Effect of tropical nights on birth outcomes by SES and trimester, sensitivity analysis

|                         | (1)<br>PTB<br>High SES | (2)<br>PTB<br>Medium<br>SES | (3)<br>PTB<br>Low SES | (4)<br>LBW<br>High SES | (5)<br>LBW<br>Medium<br>SES | (6)<br>LBW<br>Low SES | (7)<br>VLBW<br>High SES | (8)<br>VLBW<br>Medium<br>SES | (9)<br>VLBW<br>Low SES |
|-------------------------|------------------------|-----------------------------|-----------------------|------------------------|-----------------------------|-----------------------|-------------------------|------------------------------|------------------------|
| <b>First Trimester</b>  |                        |                             |                       |                        |                             |                       |                         |                              |                        |
| Days <0°                | -0.009*<br>(0.004)     | -0.006<br>(0.007)           | 0.020<br>(0.010)      | -0.009<br>(0.005)      | 0.003<br>(0.005)            | 0.014<br>(0.008)      | 0.001<br>(0.001)        | -0.002<br>(0.002)            | 0.003<br>(0.003)       |
| 0° - 5°                 | 0.002<br>(0.005)       | 0.011<br>(0.006)            | 0.012*<br>(0.005)     | 0.003<br>(0.003)       | 0.006<br>(0.004)            | 0.010*<br>(0.004)     | 0.000<br>(0.001)        | 0.000<br>(0.002)             | 0.002+<br>(0.001)      |
| 5° - 10°                | -0.000<br>(0.004)      | 0.006<br>(0.004)            | 0.005<br>(0.006)      | -0.002<br>(0.002)      | 0.006<br>(0.003)            | 0.007<br>(0.004)      | 0.000<br>(0.001)        | -0.000<br>(0.001)            | 0.001<br>(0.001)       |
| > 20°                   | -0.004<br>(0.007)      | -0.015*<br>(0.005)          | -0.014*<br>(0.005)    | 0.002<br>(0.003)       | -0.004<br>(0.004)           | -0.008*<br>(0.003)    | -0.001<br>(0.001)       | -0.002<br>(0.001)            | -0.001<br>(0.002)      |
| <b>Second Trimester</b> |                        |                             |                       |                        |                             |                       |                         |                              |                        |
| Days <0°                | -0.006<br>(0.005)      | -0.014*<br>(0.006)          | 0.012<br>(0.006)      | -0.010*<br>(0.004)     | -0.012*<br>(0.005)          | -0.002<br>(0.005)     | -0.001<br>(0.001)       | -0.002<br>(0.002)            | 0.000<br>(0.002)       |
| 0° - 5°                 | 0.001<br>(0.005)       | -0.002<br>(0.006)           | 0.005<br>(0.004)      | 0.002<br>(0.002)       | -0.006<br>(0.005)           | -0.004<br>(0.004)     | -0.000<br>(0.001)       | -0.001<br>(0.001)            | -0.001<br>(0.001)      |
| 5° - 10°                | -0.007*<br>(0.003)     | -0.002<br>(0.003)           | -0.000<br>(0.004)     | -0.005*<br>(0.002)     | -0.004<br>(0.003)           | -0.001<br>(0.004)     | -0.002<br>(0.001)       | -0.001<br>(0.001)            | 0.000<br>(0.001)       |
| > 20°                   | -0.002<br>(0.003)      | -0.001<br>(0.005)           | -0.011*<br>(0.004)    | 0.002<br>(0.002)       | 0.001<br>(0.003)            | -0.004<br>(0.003)     | -0.000<br>(0.001)       | 0.001<br>(0.001)             | -0.001<br>(0.002)      |
| <b>Third Trimester</b>  |                        |                             |                       |                        |                             |                       |                         |                              |                        |
| Days <0°                | 0.005<br>(0.007)       | -0.009<br>(0.009)           | 0.012<br>(0.009)      | -0.007<br>(0.005)      | -0.005<br>(0.007)           | 0.011<br>(0.007)      | 0.000<br>(0.002)        | -0.001<br>(0.003)            | 0.001<br>(0.002)       |
| 0° - 5°                 | 0.000<br>(0.006)       | 0.003<br>(0.005)            | 0.009<br>(0.005)      | 0.001<br>(0.003)       | -0.007<br>(0.005)           | 0.003<br>(0.005)      | -0.000<br>(0.001)       | -0.001<br>(0.001)            | -0.000<br>(0.001)      |
| 5° - 10°                | 0.007<br>(0.009)       | 0.004<br>(0.009)            | 0.003<br>(0.006)      | -0.002<br>(0.002)      | -0.003<br>(0.003)           | 0.004<br>(0.003)      | -0.001<br>(0.001)       | -0.000<br>(0.001)            | 0.001<br>(0.001)       |
| > 20°                   | -0.007*<br>(0.003)     | -0.009*<br>(0.004)          | -0.016*<br>(0.005)    | 0.001<br>(0.003)       | 0.001<br>(0.005)            | -0.005<br>(0.003)     | -0.001<br>(0.001)       | 0.001<br>(0.001)             | -0.000<br>(0.001)      |
| N                       | 1,482,984              | 1,146,060                   | 1,301,743             | 1,446,251              | 1,113,128                   | 1,248,156             | 1,446,251               | 1,113,128                    | 1,248,156              |

Note: Estimated impacts of tropical nights on birth outcomes by trimester of gestation and by parental socio-economic status. Robust standard errors in parentheses clustered at the provincial capital level. Coefficients are scaled by 100 to enhance readability, and they can be interpreted as percentage points changes in the specific birth outcome. The 10°-20° degrees bin is omitted as it is the reference bin referring to the comfort zone. Each model includes province-by-year of conception, province-specific polynomial quadratic in the century month of conception, and month of conception fixed effects. Demographic control variables include sex of the newborn, maternal marital status, maternal age, age squared, whether the child was firstborn, and maternal ethnic origin. Contextual controls include: population density, female employment rate, logarithm of the provincial GDP, the provincial-cohort-specific share of women with a tertiary degree, vegetation. Climatic controls include: relative humidity, solar radiation, wind speed, and average precipitation.

Significance levels: \* p<0.05

Table S6. Linear probability models predicting the effect of temperatures, sensitivity analyses with different definition of SES (2007-2016)

|                         | (1)                            | (2)                | (3)                | (4)                | (5)               | (6)                | (7)                      | (8)                  | (9)                | (10)               | (11)                 | (12)               | (13)               | (14)                  | (15)               |
|-------------------------|--------------------------------|--------------------|--------------------|--------------------|-------------------|--------------------|--------------------------|----------------------|--------------------|--------------------|----------------------|--------------------|--------------------|-----------------------|--------------------|
|                         | Maternal Education (2007-2016) |                    |                    |                    |                   |                    | Parental SES (2007-2016) |                      |                    |                    |                      |                    |                    |                       |                    |
|                         | PTB<br>< uni                   | PTB<br>uni         | LBW<br>< uni       | LBW<br>uni         | VLBW<br>< uni     | VLBW<br>uni        | PTB<br>High<br>SES       | PTB<br>Medium<br>SES | PTB<br>Low SES     | LBW<br>High SES    | LBW<br>Medium<br>SES | LBW<br>Low SES     | VLBW<br>High SES   | VLBW<br>Medium<br>SES | VLBW<br>Low<br>SES |
| <b>First Trimester</b>  |                                |                    |                    |                    |                   |                    |                          |                      |                    |                    |                      |                    |                    |                       |                    |
| Days < 5°C              | 0.006<br>(0.008)               | -0.009<br>(0.007)  | 0.003<br>(0.005)   | -0.008<br>(0.008)  | -0.000<br>(0.003) | -0.005*<br>(0.002) | -0.009<br>(0.008)        | -0.001<br>(0.009)    | 0.002<br>(0.008)   | -0.003<br>(0.009)  | -0.015*<br>(0.007)   | -0.001<br>(0.007)  | -0.003<br>(0.003)  | -0.006<br>(0.002)     | 0.001<br>(0.004)   |
| 25° - 32°C              | -0.007<br>(0.004)              | 0.003<br>(0.005)   | -0.008*<br>(0.004) | 0.002<br>(0.005)   | -0.001<br>(0.002) | -0.002<br>(0.002)  | 0.004<br>(0.005)         | -0.004<br>(0.004)    | -0.018*<br>(0.004) | -0.001<br>(0.005)  | -0.002<br>(0.005)    | -0.013*<br>(0.005) | -0.002<br>(0.001)  | -0.005*<br>(0.002)    | -0.003<br>(0.002)  |
| > 32°C                  | 0.028<br>(0.072)               | -0.004<br>(0.048)  | 0.010<br>(0.050)   | -0.096<br>(0.060)  | 0.037*<br>(0.016) | -0.003<br>(0.016)  | 0.071<br>(0.067)         | -0.023<br>(0.067)    | -0.038<br>(0.049)  | 0.016<br>(0.084)   | -0.007<br>(0.052)    | -0.078*<br>(0.032) | 0.025<br>(0.022)   | 0.003<br>(0.012)      | 0.038<br>(0.026)   |
| <b>Second Trimester</b> |                                |                    |                    |                    |                   |                    |                          |                      |                    |                    |                      |                    |                    |                       |                    |
| Days < 5°C              | -0.005<br>(0.007)              | -0.003<br>(0.008)  | -0.007<br>(0.007)  | -0.002<br>(0.008)  | -0.001<br>(0.002) | -0.004<br>(0.002)  | 0.004<br>(0.009)         | -0.018*<br>(0.008)   | 0.001<br>(0.010)   | 0.006<br>(0.008)   | -0.017*<br>(0.008)   | -0.008<br>(0.008)  | -0.005*<br>(0.002) | -0.003<br>(0.003)     | 0.000<br>(0.004)   |
| 25° - 32°C              | 0.001<br>(0.004)               | 0.007<br>(0.005)   | -0.004<br>(0.004)  | 0.002<br>(0.004)   | 0.002<br>(0.002)  | 0.001<br>(0.002)   | -0.001<br>(0.007)        | 0.002<br>(0.004)     | -0.005<br>(0.005)  | -0.005<br>(0.005)  | -0.002<br>(0.005)    | -0.008<br>(0.005)  | 0.002<br>(0.002)   | -0.002<br>(0.002)     | 0.001<br>(0.003)   |
| > 32°C                  | 0.019<br>(0.055)               | -0.082*<br>(0.040) | 0.122*<br>(0.058)  | 0.001<br>(0.041)   | 0.019<br>(0.041)  | 0.020<br>(0.017)   | -0.050<br>(0.045)        | -0.051<br>(0.055)    | 0.039<br>(0.077)   | -0.010<br>(0.047)  | 0.092*<br>(0.048)    | 0.187*<br>(0.076)  | -0.005<br>(0.012)  | 0.028<br>(0.020)      | 0.046<br>(0.040)   |
| <b>Third Trimester</b>  |                                |                    |                    |                    |                   |                    |                          |                      |                    |                    |                      |                    |                    |                       |                    |
| Days < 5°C              | -0.001<br>(0.007)              | -0.001<br>(0.007)  | -0.006<br>(0.006)  | -0.006<br>(0.007)  | -0.003<br>(0.002) | -0.004<br>(0.002)  | -0.007<br>(0.008)        | 0.001<br>(0.008)     | -0.006<br>(0.008)  | -0.007<br>(0.008)  | -0.012<br>(0.008)    | -0.010<br>(0.007)  | -0.004*<br>(0.002) | -0.004<br>(0.003)     | -0.005*<br>(0.003) |
| 25° - 32°C              | 0.007<br>(0.004)               | 0.001<br>(0.004)   | 0.007*<br>(0.004)  | 0.005<br>(0.004)   | 0.001<br>(0.001)  | -0.001<br>(0.001)  | 0.001<br>(0.004)         | -0.001<br>(0.005)    | 0.001<br>(0.005)   | 0.003<br>(0.004)   | 0.004<br>(0.005)     | 0.001<br>(0.005)   | 0.001<br>(0.001)   | -0.004*<br>(0.002)    | 0.001<br>(0.002)   |
| > 32°C                  | -0.166*<br>(0.049)             | -0.081<br>(0.050)  | -0.069<br>(0.047)  | -0.097*<br>(0.035) | -0.015<br>(0.010) | -0.026<br>(0.014)  | -0.022<br>(0.073)        | -0.164***<br>(0.038) | -0.171*<br>(0.053) | -0.097*<br>(0.040) | -0.071<br>(0.044)    | -0.024<br>(0.053)  | -0.032*<br>(0.009) | -0.045*<br>(0.015)    | 0.005<br>(0.015)   |
| N.                      | 811,801                        | 631,030            | 782,025            | 621,836            | 782,025           | 621,836            | 494,557                  | 390,142              | 439,490            | 486,967            | 383,324              | 426,252            | 486,967            | 383,324               | 426,252            |

Note: Estimated impacts of temperature on birth outcomes by trimester of gestation and by parental socio-economic status and maternal education. Estimates obtained for the subsample in which information on maternal education is available (conceptions 2007-2016). Robust standard errors in parentheses clustered at the provincial capital level. Coefficients are scaled by 100 to enhance readability, and they can be interpreted as percentage points changes in the specific birth outcome. The 5°-25° degrees bin is omitted as it is the reference bin referring to the comfort zone. Each model includes province-by-year of conception, province-specific polynomial quadratic in the century month of conception, and month of conception fixed effects. Demographic control variables include sex of the newborn, maternal marital status, maternal age, age squared, whether the child was firstborn, and maternal ethnic origin. Contextual controls include: population density, female employment rate, logarithm of the provincial GDP, the provincial-cohort-specific share of women with a tertiary degree, vegetation. Climatic controls include: relative humidity, solar radiation, wind speed, and average precipitation.

Significance levels: \* p<0.05

Table S7. Linear probability models estimating the effect of temperatures on birth outcomes, alternative FE specifications

|                              | (1)                | (2)               | (3)               | (4)                | (5)                | (6)                | (7)               | (8)               | (9)               |
|------------------------------|--------------------|-------------------|-------------------|--------------------|--------------------|--------------------|-------------------|-------------------|-------------------|
|                              | High SES           |                   |                   | Medium SES         |                    |                    | Low SES           |                   |                   |
| <b>Preterm birth</b>         |                    |                   |                   |                    |                    |                    |                   |                   |                   |
| Days < 5°C                   | 0.003<br>(0.002)   | 0.003<br>(0.006)  | 0.008<br>(0.008)  | -0.010*<br>(0.003) | -0.011*<br>(0.004) | -0.007<br>(0.006)  | 0.006*<br>(0.003) | 0.006<br>(0.008)  | 0.010<br>(0.008)  |
| 25°-32°C                     | 0.003<br>(0.003)   | 0.005<br>(0.003)  | 0.006*<br>(0.003) | -0.000<br>(0.003)  | 0.006<br>(0.004)   | 0.005<br>(0.004)   | -0.005<br>(0.003) | -0.004<br>(0.005) | -0.004<br>(0.005) |
| Days > 32°C                  | -0.019<br>(0.012)  | -0.007<br>(0.016) | -0.009<br>(0.016) | -0.030<br>(0.034)  | 0.025<br>(0.042)   | -0.027<br>(0.041)  | -0.019<br>(0.021) | -0.019<br>(0.025) | -0.022<br>(0.024) |
| N                            | 1,482,984          |                   |                   | 1,146,060          |                    |                    | 1,301,743         |                   |                   |
| <b>Low Birth Weight</b>      |                    |                   |                   |                    |                    |                    |                   |                   |                   |
| Days < 5°C                   | -0.001<br>(0.003)  | -0.005<br>(0.004) | -0.006<br>(0.004) | -0.008*<br>(0.003) | -0.012*<br>(0.004) | -0.012*<br>(0.004) | -0.003<br>(0.002) | 0.003<br>(0.004)  | 0.005<br>(0.004)  |
| 25°-32°C                     | 0.001<br>(0.002)   | 0.004<br>(0.003)  | 0.004<br>(0.003)  | -0.001<br>(0.002)  | 0.001<br>(0.004)   | -0.001<br>(0.004)  | -0.001<br>(0.003) | 0.001<br>(0.005)  | 0.002<br>(0.005)  |
| Days > 32°C                  | -0.027*<br>(0.013) | -0.007<br>(0.011) | -0.006<br>(0.011) | 0.032<br>(0.029)   | 0.048<br>(0.033)   | 0.048<br>(0.033)   | 0.028*<br>(0.011) | 0.038*<br>(0.012) | 0.035*<br>(0.012) |
| N                            | 1,446,251          |                   |                   | 1,113,128          |                    |                    | 1,248,156         |                   |                   |
| <b>Very Low Birth Weight</b> |                    |                   |                   |                    |                    |                    |                   |                   |                   |
| Days < 5°C                   | -0.001<br>(0.001)  | 0.001<br>(0.001)  | -0.001<br>(0.001) | -0.001<br>(0.001)  | -0.002<br>(0.002)  | -0.002<br>(0.002)  | -0.001<br>(0.001) | 0.002<br>(0.001)  | 0.002<br>(0.001)  |
| 25°-32°C                     | -0.001<br>(0.001)  | -0.001<br>(0.001) | -0.001<br>(0.001) | -0.001*<br>(0.001) | -0.001<br>(0.001)  | -0.000<br>(0.001)  | 0.000<br>(0.001)  | 0.001<br>(0.002)  | 0.001<br>(0.002)  |
| Days > 32°C                  | -0.002<br>(0.005)  | 0.002<br>(0.006)  | 0.003<br>(0.006)  | -0.003<br>(0.003)  | 0.005<br>(0.006)   | 0.005<br>(0.006)   | 0.020*<br>(0.006) | 0.019*<br>(0.007) | 0.020*<br>(0.006) |
| N                            | 1,446,251          |                   |                   | 1,113,128          |                    |                    | 1,248,156         |                   |                   |
| MoC                          | X                  | X                 | X                 | X                  | X                  | X                  | X                 | X                 | X                 |
| Province x YoC               | X                  | X                 | X                 | X                  | X                  | X                  | X                 | X                 | X                 |
| Province x MoC               |                    | X                 | X                 |                    | X                  | X                  |                   | X                 | X                 |
| Province x PQ                |                    |                   | X                 |                    |                    | X                  |                   |                   | X                 |

Note: Estimated impacts of temperature on birth outcomes during the gestational period for the whole sample and by parental socio-economic status. Robust standard errors in parentheses clustered at the provincial capital level. Coefficients are scaled by 100 to enhance readability, and they can be interpreted as percentage points changes in the specific birth outcome. The 5°-25° degrees bin is omitted as it is the reference bin referring to the comfort zone. Fixed effects specified as described at the bottom of the table. Demographic control variables include sex of the newborn, maternal marital status, maternal age, age squared, whether the child was firstborn, and maternal ethnic origin. Contextual controls include: population density, female employment rate, logarithm of the provincial GDP, the provincial-cohort-specific share of women with a tertiary degree, vegetation. Climatic controls include: average humidity, solar radiation, wind speed, and humidity precipitation.

Abbreviations: MoC = month of conception; YoC = year of conception; PQ = polynomial quadratic in the century-month of conception.

Significance levels: \* p<0.05

Table S8. Placebo estimates of the effect of temperature t-9 months before conception on birth outcomes by SES

|             | (1)               | (2)               | (3)               | (4)               | (5)               | (6)                | (7)               | (8)               | (9)               |
|-------------|-------------------|-------------------|-------------------|-------------------|-------------------|--------------------|-------------------|-------------------|-------------------|
|             | PTB               | PTB               | PTB               | LBW               | LBW               | LBW                | VLBW              | VLBW              | VLBW              |
|             | High SES          | Medium SES        | Low SES           | High SES          | Medium SES        | Low SES            | High SES          | Medium SES        | Low SES           |
| < 5° t-9    | 0.008<br>(0.006)  | 0.006<br>(0.004)  | -0.001<br>(0.004) | 0.003<br>(0.003)  | 0.004<br>(0.004)  | 0.003<br>(0.004)   | -0.001<br>(0.001) | 0.002<br>(0.001)  | -0.001<br>(0.001) |
| 25°-32° t-9 | -0.002<br>(0.002) | 0.003<br>(0.003)  | 0.005*<br>(0.002) | -0.001<br>(0.003) | 0.003<br>(0.002)  | 0.004<br>(0.003)   | -0.001<br>(0.001) | 0.000<br>(0.001)  | -0.001<br>(0.001) |
| >32° t-9    | -0.010<br>(0.021) | -0.026<br>(0.039) | -0.005<br>(0.016) | -0.006<br>(0.011) | -0.029<br>(0.019) | -0.064*<br>(0.020) | 0.002<br>(0.007)  | -0.008<br>(0.005) | -0.011<br>(0.006) |
| N           | 1,482,984         | 1,146,060         | 1,301,743         | 1,446,251         | 1,113,128         | 1,248,156          | 1,446,251         | 1,113,128         | 1,248,156         |

*Note:* Placebo estimate of temperatures t-9 month before conception on birth outcomes by trimester of gestation and by parental socioeconomic status. Robust standard errors in parentheses clustered at the provincial capital level. Coefficients are scaled by 100 to enhance readability, and they can be interpreted as percentage points changes in the specific birth outcome. The 5°-25° degrees bin is omitted as it is the reference bin referring to the comfort zone. Each model includes province-by-year of conception, province-specific polynomial quadratic in the century month of conception, and month of conception fixed effects. Demographic control variables include sex of the newborn, maternal marital status, maternal age, age squared, whether the child was firstborn, and maternal ethnic origin. Contextual controls include: population density, female employment rate, logarithm of the provincial GDP, the provincial-cohort-specific share of women with a tertiary degree, vegetation. Climatic controls include: humidity humidity, solar radiation, wind speed, and average precipitation.

Significance levels: \* p<0.05



Figure S1. Effect of extreme heat on birth outcomes by SES and newborn's sex

Effect of Extreme Heat (>32°) by SES and Newborn's Sex

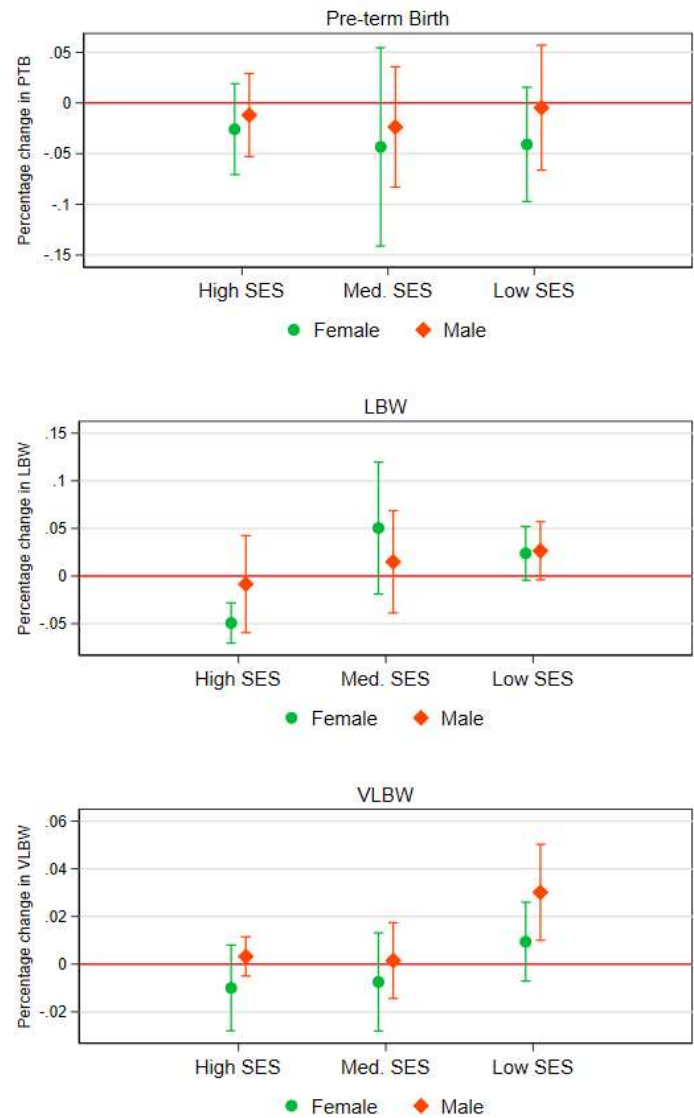

*Note:* Estimated impacts of temperature on birth outcomes during the gestational period for the whole sample and by parental socio-economic status and newborn's sex. Coefficients are scaled by 100 to enhance readability, and they can be interpreted as percentage points changes in the specific birth outcome. The 5°-25° degrees bin is omitted as it is the reference bin referring to the comfort zone. Each model includes province-by-year of conception, province-specific polynomial quadratic in the century month of conception, and month of conception fixed effects. Demographic control variables include maternal marital status, maternal age, age squared, whether the child was firstborn, and maternal ethnic origin. Contextual controls include: population density, female employment rate, logarithm of the provincial GDP, the provincial-cohort-specific share of women with a tertiary degree, vegetation. Climatic controls include: relative humidity, solar radiation, wind speed, and average precipitation.
